# Supplementary material for: Crystal structure of the lytic CHAPK domain of the endolysin LysK from Staphylococcus aureus bacteriophage K
Source: PubMed Central journal article supplement (PMC4126393; doi:10.1186/1743-422x-11-133), 2014-07-26
Supplement: 1743-422X-11-133-S1.pdf [file 1743-422X-11-133-S1.pdf]

# ConSurf Color-Coded MSA

## CHAPk

UniRef90\_U6FYE9. Autolysin. *Staphylococcus capitis* CR01  
UniRef90\_D3QFD1. Phage N-acetylmuramoyl-L-alanine amidase. *Staphylococcus lugdunensis*  
UniRef90\_UPI0002FAEBEA. Amidase. *Staphylococcus capitis*  
UniRef90\_H9A139. Lysin. *Staphylococcus* phage StB20  
UniRef90\_B9CV69. SH3 domain protein. *Staphylococcus capitis* SK14  
UniRef90\_Q4L3Y5. N-acetylmuramoyl-L-alanine amidase. *Staphylococcus haemolyticus*  
UniRef90\_D1GQI6. Phage amidase. *Staphylococcus aureus*  
UniRef90\_E8SE62. Autolysin. *Staphylococcus pseudintermedius*  
UniRef90\_Q8SDJ9. Amidase. *Staphylococcus* phage phi13  
UniRef90\_UPI00035CC3BA. Amidase. *Staphylococcus epidermidis*  
UniRef90\_Q4Z8Y9. ORF015. *Staphylococcus* phage Twort  
UniRef90\_E8SE60. Bifunctional autolysin Atl. *Staphylococcus pseudintermedius*  
UniRef90\_056785. Cell wall hydrolase Ply187. *Staphylococcus* phage 187  
UniRef90\_H9A0Q2. Lysine. *Staphylococcus* phage StB27  
UniRef90\_I6T7G5. Amidase. *Staphylococcus* phage vB\_SepiS-phiIPLA5  
UniRef90\_Q859K9. Amidase. *Staphylococcus* phage 44AHJD  
UniRef90\_A8D3S8. Amidase. *Staphylococcus* phage SAP-2  
UniRef90\_I7KMZ0. Possible N-acetylmuramoyl-L-alanine amidase. *Staphylococcus equorum*  
UniRef90\_K8N672. Uncharacterized protein. *Staphylococcus simulans*  
UniRef90\_UPI00036FC933. Hypothetical protein. *Staphylococcus intermedius*  
UniRef90\_K0U7Q5. Autolysin. *Staphylococcus arlettae* CVD059

## Input\_pdb\_ATOM\_A

UniRef90\_U6FYE9\_2\_161  
UniRef90\_D3QFD1\_2\_162  
UniRef90\_UPI0002FAEBEA\_2\_162  
UniRef90\_H9A139\_2\_162  
UniRef90\_B9CV69\_2\_162  
UniRef90\_Q4L3Y5\_3\_166  
UniRef90\_D1GQI6\_2\_161  
UniRef90\_E8SE62\_11\_138  
UniRef90\_Q8SDJ9\_11\_138  
UniRef90\_UPI00035CC3BA\_1\_125  
UniRef90\_Q4Z8Y9\_9\_144  
UniRef90\_E8SE60\_20\_150  
UniRef90\_056785\_20\_150  
UniRef90\_H9A0Q2\_224\_354  
UniRef90\_I6T7G5\_224\_354  
UniRef90\_Q859K9\_9\_139  
UniRef90\_A8D3S8\_9\_138  
UniRef90\_I7KMZ0\_224\_353  
UniRef90\_K8N672\_224\_351  
UniRef90\_UPI00036FC933\_26\_147  
UniRef90\_K0U7Q5\_4\_128

```
AKTQAEINKRLDAYAKGTVDSPYRVKKAATSYDPSFGVMEAGAI DADGYH  
-KTQSQINKRLRDYKNGVVDSPYRVKRWTSYDASF GMEPGAIDVDRSYH  
-KTQSQINARLDTYKNGTVDSPYRVKRWTSYDPAFSTMEPGCVDDHDFYH  
-KTQSQINARLNAYKNGTVDSPYRVKRWTSYDPAFSTMEPGCIDVDHAYH  
-KTQSQINKRLRDYKNGVVDSPYRVKHWTSYDASF GMEPGCIDKDRAYH  
-KTQSQINKRLRDYKNGVVDSPYRVKRWTSYDASF GMEPGCIDKDHSHF  
-KTQAEINKRLDAYRKGTVDSPYRVKRWTSYDNRFYPMEPG CIDVDKSFH  
-KTQKQVAERLRAYVNGTVDSPYRVRTWTHYDDDFGTMEPGCIDVDRSFH  
-----LRWYVGRYIDFDGYWA  
-----LRWYQGRYIDFDGWYG  
-----MEPGCIDKDRAYH  
-----SYIKSKVNTGTDFDGLYG  
-----NLIGSGVDVDGYG  
-----NLIGSGVDVDGYG  
-----NYMYSLKGKYYVDFDGMYG  
-----NYMYSLKGKGFVDFDNRWA  
-----EWIYKHEGAGVDFDGYG  
-----DWIYKHEGVGVDFDGYG  
-----EYMHS LKGLFVDFDNAFA  
-----SYMKG LKGRYIDFDKAWA  
-----KGVVDVDGYG  
-----LKGKYYVDFDKKFA
```

## Input\_pdb\_ATOM\_A

UniRef90\_U6FYE9\_2\_161  
UniRef90\_D3QFD1\_2\_162  
UniRef90\_UPI0002FAEBEA\_2\_162  
UniRef90\_H9A139\_2\_162  
UniRef90\_B9CV69\_2\_162  
UniRef90\_Q4L3Y5\_3\_166  
UniRef90\_D1GQI6\_2\_161  
UniRef90\_E8SE62\_11\_138  
UniRef90\_Q8SDJ9\_11\_138  
UniRef90\_UPI00035CC3BA\_1\_125  
UniRef90\_Q4Z8Y9\_9\_144  
UniRef90\_E8SE60\_20\_150  
UniRef90\_056785\_20\_150  
UniRef90\_H9A0Q2\_224\_354  
UniRef90\_I6T7G5\_224\_354  
UniRef90\_Q859K9\_9\_139  
UniRef90\_A8D3S8\_9\_138

```
AQCQDLITDYVLWLT DNKVRTWGN AKDQIK --- QSYGTG --FKIHENKPS  
AQCADLPTDYILWLT DNKYRAWGN AKDFPN --- NKFPKG --WKIVENKPS  
AQCADLPTDYILWLT DNQYKAWGN AKDFPN --- NKFPKG --WKIVENMPE  
AQCADLPIDYILWLT DNQYRAWGN AKDFPN --- NKFPKG --WKIVENLPS  
AQCMDLAIDYVMWLT DNQTE MWGDAKSSIK --- NKFPKG --WKIVENKPS  
AQCMDLAIDYVMWLT DNQTE MWGDAKSSIM --- NKFPKG --WKIVENKPS  
AQCADLTDYIYLWLT DNEFRIRGN AKDAINPKKNKLEPG --WKIVLNKPS  
AQCMDLVVDYCLWISDNQFRIRGN AKQAID --- NPLPKG --WKIIRNERA  
YQCMDLAVDYIYWL LD --IRMWGN AKDAIN --- NDFKNM --ATIYENTPS  
YQCADLAVDYIYWL LE --IRMWGN AKDAIN --- NDFKNM --ATVYENTPS  
AQCMDLAIDYVMWLT DNQTE MWGDAKSSLM --- NKFPKE --WKIVENKPS  
YQCMDLAVDYIYHVT DGKIRMWGN AKDAIN --- NSFGGT --ATVYKNYPA  
RQCWDL P-NYIFNRYWG -FKTPGN ARDMAW --- YRYPAG --FKIYKNTTN  
RQCWDL P-NYIFNRYWN -FKTPGN ARDMAW --- YRYPEG --FKVFRNTSD  
EQCMDLAVQYVYHITDGTIRMWGN AKDSIL --- NVFPKG --WQIVKNTPS  
YQCMDLAVDYVYHITNGKVRMWGN AKDSIL --- NIFPKG --WKIVKNTPD  
FQCMDLSVAYVYHITDGTIRMWGN AKDAIN --- NDFKGL --ATVYKNTPS  
FQCMDLAVAYIYYITDGTIRMWGN AKDAIN --- NDFKGL --ATVYENTSS
```

|                               |   |   |   |   |   |   |   |   |   |   |   |   |   |   |   |   |   |   |   |   |   |   |   |   |   |   |   |   |   |   |   |   |   |   |   |   |   |   |   |   |   |   |   |   |   |   |   |   |   |   |
|-------------------------------|---|---|---|---|---|---|---|---|---|---|---|---|---|---|---|---|---|---|---|---|---|---|---|---|---|---|---|---|---|---|---|---|---|---|---|---|---|---|---|---|---|---|---|---|---|---|---|---|---|---|
| UniRef90_I7KMZ0_224_353       | Y | Q | C | M | D | L | I | V | D | F | A | D | H | V | T | N | G | - | Y | R | I | W | G | N | A | K | D | L | T | W | - | - | - | V | A | L | P | K | G | - | - | W | K | L | V | E | N | T | P | D |
| UniRef90_K8N672_224_351       | F | Q | C | M | D | V | A | V | D | Y | V | Y | H | V | T | K | G | K | V | R | M | W | G | D | A | K | D | S | I | R | - | - | - | N | V | F | P | T | G | - | - | W | K | V | I | E | N | T | P | D |
| UniRef90_UPI00036FC933_26_147 | M | Q | C | W | D | L | P | - | N | Y | I | L | K | K | Y | W | G | - | F | T | T | W | G | N | A | N | A | M | A | Q | - | - | - | K | S | N | Y | R | G | N | D | F | K | I | Y | R | N | T | P | S |
| UniRef90_K0U7Q5_4_128         | F | Q | C | M | D | L | I | V | D | F | A | D | H | V | T | N | G | - | Y | R | I | W | G | N | A | K | D | L | T | W | - | - | - | V | A | L | P | K | G | - | - | W | K | L | V | E | N | T | P | D |

|                               |   |   |   |   |   |   |   |   |   |   |   |   |   |   |   |   |   |   |   |   |   |   |   |   |   |   |   |   |   |   |   |   |   |   |   |   |   |   |   |   |   |   |   |   |   |   |   |   |   |   |
|-------------------------------|---|---|---|---|---|---|---|---|---|---|---|---|---|---|---|---|---|---|---|---|---|---|---|---|---|---|---|---|---|---|---|---|---|---|---|---|---|---|---|---|---|---|---|---|---|---|---|---|---|---|
| Input_pdb_ATOM_A              | T | V | P | K | K | G | W | I | A | V | F | T | S | G | S | Y | - | - | E | Q | W | G | H | I | G | I | V | Y | - | D | G | - | - | - | G | N | T | S | T | F | T | I | L | E | Q | N | W | N | G | Y |
| UniRef90_U6FYE9_2_161         | T | I | P | K | K | G | W | I | A | V | F | T | S | G | T | Y | - | - | A | Q | Y | G | H | I | G | I | V | Y | - | N | G | - | - | - | G | N | T | T | S | F | Q | I | L | E | Q | N | W | N | G | W |
| UniRef90_D3QFD1_2_162         | T | V | P | Q | K | G | W | I | A | V | F | T | S | G | T | Y | - | - | A | Q | Y | G | H | I | G | I | V | Y | - | N | G | - | - | - | G | N | T | S | F | Q | I | L | E | Q | N | W | N | G | Y |   |
| UniRef90_UPI0002FAEBEA_2_162  | T | V | P | Q | K | G | W | I | A | V | F | S | S | G | T | Y | - | - | A | Q | Y | G | H | I | G | L | V | Y | - | D | G | - | - | - | G | N | T | S | F | E | I | L | E | Q | N | W | N | G | Y |   |
| UniRef90_H9A139_2_162         | T | I | P | K | K | G | W | I | A | V | Y | T | A | G | T | Y | - | - | S | R | Y | G | H | I | G | I | V | Y | - | N | G | - | - | - | G | N | T | S | F | Q | I | L | E | Q | N | W | N | G | W |   |
| UniRef90_B9CV69_2_162         | T | I | P | K | K | G | W | I | A | V | F | T | S | G | T | Y | - | - | D | K | Y | G | H | I | G | I | V | Y | - | N | G | - | - | - | G | N | T | S | F | Q | I | L | E | Q | N | W | N | G | W |   |
| UniRef90_Q4L3Y5_3_166         | T | V | P | R | K | G | W | I | A | V | F | T | D | G | T | Y | - | - | W | E | Y | G | H | I | G | M | V | Y | - | D | G | - | - | - | G | N | T | S | R | F | Q | I | L | E | Q | N | W | N | G | W |
| UniRef90_D1GQI6_2_161         | T | V | P | K | Q | G | W | I | G | V | N | T | S | - | - | - | - | - | T | Y | Y | G | H | I | W | L | V | D | - | K | G | - | - | - | A | T | Q | M | T | M | P | V | I | E | Q | N | W | N | S | L |
| UniRef90_E8SE62_11_138        | F | V | P | Q | V | G | D | V | A | V | F | R | N | G | I | Y | - | - | K | Q | Y | G | H | I | G | I | V | Y | - | N | S | - | - | - | G | N | T | N | Q | F | L | I | L | E | Q | N | F | D | G | N |
| UniRef90_Q8SDJ9_11_138        | F | V | P | Q | I | G | D | V | A | V | F | T | K | G | I | Y | - | - | K | Q | Y | G | H | I | G | L | V | F | - | N | G | - | - | - | G | N | T | N | Q | F | L | I | L | E | Q | N | Y | D | G | N |
| UniRef90_UPI00035CC3BA_1_125  | T | V | P | K | K | G | W | I | A | V | Y | T | S | G | I | Y | - | - | S | R | Y | G | H | I | G | I | V | Y | - | E | G | - | - | - | G | N | T | S | F | Q | I | L | E | Q | N | W | N | G | W |   |
| UniRef90_Q4Z8Y9_9_144         | F | R | P | K | Y | G | D | V | V | W | T | T | G | N | F | - | - | A | T | Y | G | H | I | A | I | V | T | - | N | P | D | P | Y | G | D | L | Q | Y | V | T | V | L | E | Q | N | W | N | G | N |   |
| UniRef90_E8SE60_20_150        | F | V | P | K | P | G | D | M | A | I | W | T | G | G | N | Y | N | W | N | T | W | G | H | T | G | I | V | V | - | G | P | - | - | - | S | T | K | D | Y | F | Y | S | V | D | Q | N | W | N | N | A |
| UniRef90_056785_20_150        | F | V | P | K | P | G | D | I | A | V | W | T | G | G | N | Y | N | W | N | T | W | G | H | T | G | I | V | V | - | G | P | - | - | - | S | T | K | S | Y | F | Y | S | V | D | Q | N | W | N | S |   |
| UniRef90_H9A0Q2_224_354       | Y | I | P | P | V | G | A | I | G | V | C | T | T | G | I | Y | - | - | Q | E | Y | G | H | I | Y | L | V | W | D | N | S | - | - | - | G | G | T | N | T | Q | T | V | L | E | Q | N | F | D | G | N |
| UniRef90_I6T7G5_224_354       | Y | V | P | P | V | G | A | I | G | V | C | T | Y | G | I | Y | - | - | Q | R | Y | G | H | I | Y | L | V | W | D | N | S | - | - | - | G | G | T | N | T | Q | T | V | L | E | Q | N | F | D | G | N |
| UniRef90_Q859K9_9_139         | F | K | P | Q | L | G | D | V | A | V | Y | T | N | G | - | - | - | - | Q | Y | G | H | I | Q | C | V | L | - | - | S | - | - | - | G | N | L | D | Y | T | T | C | L | E | Q | N | W | L | G | G |   |
| UniRef90_A8D3S8_9_138         | F | K | P | Q | L | G | D | V | A | V | Y | T | N | S | - | - | - | - | Q | Y | G | H | I | Q | C | V | T | - | - | S | - | - | - | G | N | L | D | Y | T | T | C | L | E | Q | N | W | L | N | G |   |
| UniRef90_I7KMZ0_224_353       | Y | V | P | P | I | G | T | I | A | V | F | T | K | G | I | Y | - | - | K | K | W | G | H | T | G | L | V | W | D | N | S | - | - | - | G | G | T | E | S | F | V | I | L | E | Q | N | Y | D | T | L |
| UniRef90_K8N672_224_351       | Y | I | P | P | V | A | S | I | A | V | N | A | A | G | - | - | - | - | E | F | G | H | I | G | L | V | S | N | E | - | - | - | - | G | G | T | E | W | F | T | I | I | E | Q | N | W | D | N | Q |   |
| UniRef90_UPI00036FC933_26_147 | F | V | P | L | P | G | D | W | A | V | W | A | G | S | N | P | - | - | - | - | G | H | V | S | I | V | V | - | G | P | - | - | - | A | S | T | S | Y | F | Y | S | C | D | Q | N | W | Y | T | A |   |
| UniRef90_K0U7Q5_4_128         | Y | V | P | P | I | A | S | I | A | V | F | T | K | G | I | Y | - | - | K | K | W | G | H | T | G | L | V | W | D | N | S | - | - | - | G | G | T | E | T | F | V | I | L | E | Q | N | Y | D | T | L |

|                               |   |   |   |   |   |   |   |   |   |   |   |   |   |   |   |   |   |   |   |   |   |   |   |   |   |   |   |   |
|-------------------------------|---|---|---|---|---|---|---|---|---|---|---|---|---|---|---|---|---|---|---|---|---|---|---|---|---|---|---|---|
| Input_pdb_ATOM_A              | - | - | - | A | N | K | K | P | T | K | R | V | D | N | Y | Y | G | L | T | H | F | I | E | I | P | V | K | A |
| UniRef90_U6FYE9_2_161         | - | - | - | A | N | K | K | P | S | L | R | W | D | N | Y | Y | G | L | T | H | F | I | V | P | P | V | - | - |
| UniRef90_D3QFD1_2_162         | - | - | - | A | N | K | K | P | T | L | R | W | D | N | Y | Y | G | L | T | H | F | I | V | P | P | V | - | - |
| UniRef90_UPI0002FAEBEA_2_162  | - | - | - | A | N | K | K | P | T | L | R | W | D | N | Y | Y | G | L | T | H | F | I | V | P | P | V | - | - |
| UniRef90_H9A139_2_162         | - | - | - | A | N | K | K | P | S | L | R | W | D | N | Y | Y | G | L | T | H | F | I | V | P | P | V | - | - |
| UniRef90_B9CV69_2_162         | - | - | - | A | N | K | K | P | S | L | R | W | D | N | Y | Y | G | L | T | H | F | I | V | P | P | V | - | - |
| UniRef90_Q4L3Y5_3_166         | - | - | - | A | N | K | K | P | S | L | R | W | D | N | Y | Y | G | L | T | H | F | I | V | P | P | V | - | - |
| UniRef90_D1GQI6_2_161         | - | - | - | A | N | L | K | P | K | R | R | L | D | Y | Y | Y | G | C | T | H | F | I | V | P | P | I | S | S |
| UniRef90_E8SE62_11_138        | - | - | - | A | N | T | P | A | S | L | R | W | D | N | Y | Y | G | C | T | H | F | I | R | P | H | Y | K | S |
| UniRef90_Q8SDJ9_11_138        | - | - | - | A | N | T | P | A | K | L | R | W | D | N | Y | Y | G | C | T | H | F | I | R | P | K | Y | K | S |
| UniRef90_UPI00035CC3BA_1_125  | - | - | - | A | N | K | K | P | S | L | R | W | D | N | Y | Y | G | L | T | H | F | I | V | P | P | V | - | - |
| UniRef90_Q4Z8Y9_9_144         | G | I | Y | K | T | E | L | A | T | I | R | T | H | D | Y | T | G | I | T | H | F | I | R | P | N | F | - | - |
| UniRef90_E8SE60_20_150        | N | S | Y | V | G | S | P | A | A | K | I | K | H | S | Y | F | G | V | T | H | F | V | R | P | A | Y | K | S |
| UniRef90_056785_20_150        | N | S | Y | V | G | S | P | A | A | K | I | K | H | S | Y | F | G | V | T | H | F | V | R | P | A | Y | K | A |
| UniRef90_H9A0Q2_224_354       | - | - | - | H | N | T | P | A | K | L | R | V | D | N | F | Y | G | T | T | H | Y | I | V | P | S | F | - | - |
| UniRef90_I6T7G5_224_354       | - | - | - | A | D | T | P | A | K | L | R | V | D | N | F | Y | G | T | T | H | Y | I | V | P | S | F | - | - |
| UniRef90_Q859K9_9_139         | G | F | D | G | W | E | K | A | T | I | R | T | H | Y | Y | D | G | V | T | H | F | I | R | P | K | F | S | G |
| UniRef90_A8D3S8_9_138         | G | Y | D | G | W | E | K | A | T | I | R | T | H | Y | Y | D | G | V | T | H | F | I | R | P | K | F | S | - |
| UniRef90_I7KMZ0_224_353       | - | - | - | A | N | S | P | A | K | L | R | T | D | N | F | E | G | L | T | H | F | I | V | P | D | F | - | - |
| UniRef90_K8N672_224_351       | - | - | - | A | D | T | P | A | K | L | R | K | N | D | Y | S | Q | I | T | H | F | I | V | P | D | F | - | - |
| UniRef90_UPI00036FC933_26_147 | N | - | W | T | G | S | P | A | Y | K | I | K | H | N | Y | N | G | V | T | H | F | V | R | P | P | Y | K | - |
| UniRef90_K0U7Q5_4_128         | - | - | - | A | N | S | P | A | K | L | R | T | D | N | F | E | G | L | T | H | F | I | V | P | D | F | - | - |

1 2 3 4 5 6 7 8 9  
Variable Average Conserved

⊠ - Insufficient data - the calculation for this site was performed on less than 10% of the sequences.
